# Supplementary material for: A new 3-D two-fold interpenetrated framework with sqp net based on Cu6I6 and Cu8I8 cluster nodes
Source: Royal Society of Chemistry journal article supplement (doi:10.1039/b902936m), 2009-01-01
Supplement: b902936m.pdf [file b902936m.pdf]

## A New Three-Dimensional Two-Fold Interpenetrated Framework with sqp Net Based on Cu<sub>6</sub>I<sub>6</sub> and Cu<sub>8</sub>I<sub>8</sub> Cluster Nodes

Qin Hou,<sup>a</sup> Jie-Hui Yu,<sup>a,b\*</sup> Jia-Ning Xu,<sup>a</sup> Qing-Feng Yang<sup>a</sup> and Ji-Qing Xu<sup>a\*</sup>

<sup>a</sup>College of Chemistry and State Key Laboratory of Inorganic Synthesis and Preparative Chemistry, Jilin University, Changchun, 130023, P.R China

<sup>b</sup>State Key Laboratory of Coordination Chemistry, Nanjing University, Nanjing, Jiangsu 210093, China

E-mail: jiehuiyu@yahoo.com.cn; xjq@mail.jlu.edu.cn. Phone: +86-431-88499132; Fax: +86-431-85168624.

Table. S1. Selected bond lengths (Å) for the title compound.

|            |            |              |            |
|------------|------------|--------------|------------|
| Cu(1)-I(1) | 2.801(3)   | Cu(7)-I(8)   | 2.6034(16) |
| Cu(1)-I(2) | 2.5983(13) | Cu(8)-I(7)   | 2.6544(15) |
| Cu(2)-I(1) | 2.6133(12) | Cu(8)-I(8)   | 2.7162(16) |
| Cu(2)-I(2) | 2.6791(12) | Cu(8)-I(9)   | 2.6937(10) |
| Cu(2)-I(3) | 2.6435(14) | Cu(9)-I(8)   | 2.6863(12) |
| Cu(3)-I(2) | 2.6884(13) | Cu(9)-I(9)   | 2.6379(11) |
| Cu(3)-I(3) | 2.6497(13) | Cu(9)-I(10)  | 2.6513(11) |
| Cu(3)-I(4) | 2.6253(12) | Cu(10)-I(9)  | 2.6917(10) |
| Cu(4)-I(3) | 2.6892(12) | Cu(10)-I(10) | 2.7812(17) |
| Cu(4)-I(4) | 2.628(2)   | Cu(2)-N(2)   | 2.099(5)   |
| Cu(5)-I(5) | 2.6925(19) | Cu(3)-N(3)   | 2.128(6)   |
| Cu(5)-I(6) | 2.7532(11) | Cu(4)-N(7)#1 | 2.146(10)  |
| Cu(6)-I(5) | 2.6428(12) | Cu(5)-N(5)   | 2.189(10)  |
| Cu(6)-I(6) | 2.6335(12) | Cu(6)-N(4)#2 | 2.107(6)   |
| Cu(6)-I(7) | 2.7513(13) | Cu(9)-N(1)   | 2.099(6)   |
| Cu(7)-I(6) | 2.7270(11) | Cu(10)-N(6)  | 2.089(9)   |
| Cu(7)-I(7) | 2.7475(18) |              |            |

Symmetry codes: #1 -x+3/2, -y+2, z-1/2; #2 x-1, y, z.

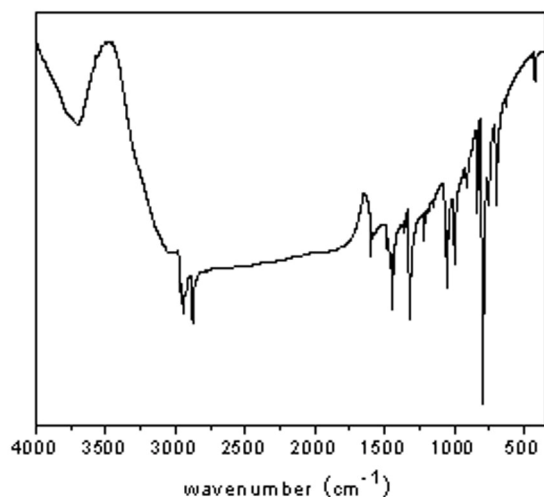

**Fig. S1.** The IR spectrum of the title compound.

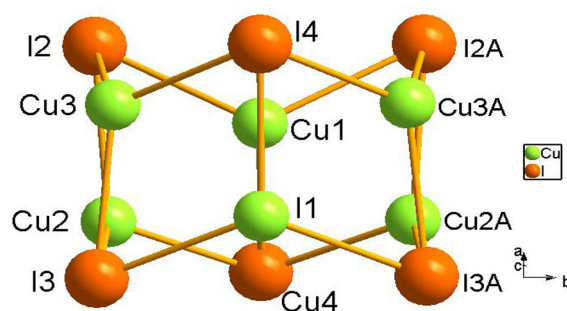

**Fig. S2** The Cu<sub>6</sub>I<sub>6</sub> cluster unit.

As shown in Fig. S2, Cu2A, Cu3A, I2A, I3A are obtained from Cu2, Cu3, I2, I3 by mirror symmetry. Cu1, I4, I1 and Cu4 just lie on the mirror plane perpendicular to the *b* axis. The neighboring Cu<sub>6</sub>I<sub>6</sub> units are obtained by the translation along *a*, *b*, *c* direction, respectively.

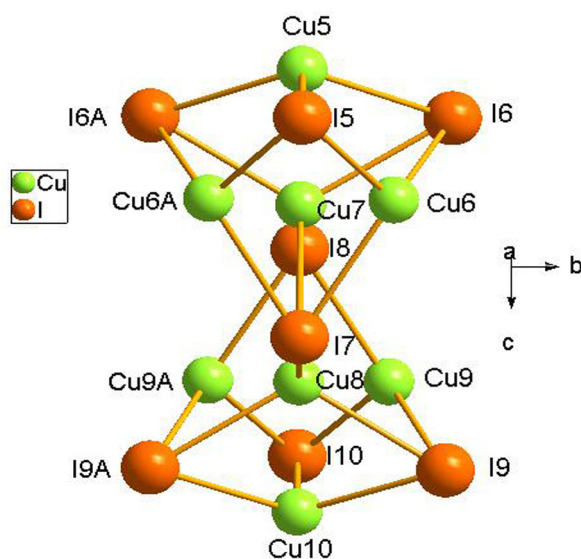

**Fig. S3.** The Cu<sub>8</sub>I<sub>8</sub> cluster unit.

As shown in Fig. S3. Cu6A, I6A, Cu9A, I9A are obtained from Cu6, I6, Cu9, I9 by mirror symmetry. Cu5, I5, Cu7, I8, I7, Cu8, I10 and Cu10 just lie on the mirror plane perpendicular to the *b* axis. The neighboring Cu<sub>8</sub>I<sub>8</sub> units are obtained by the translation along *a*, *b*, *c* direction, respectively.

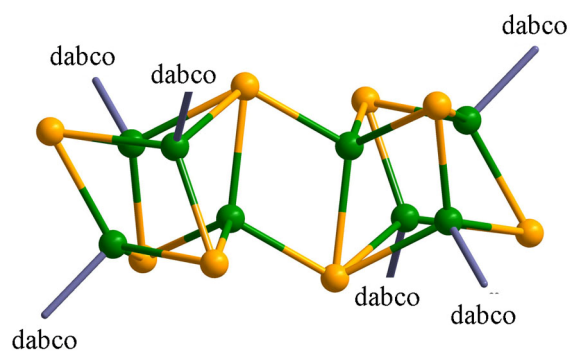

**Fig. S4.** The Cu<sub>8</sub>I<sub>8</sub> cluster unit in the reported compound for comparison.

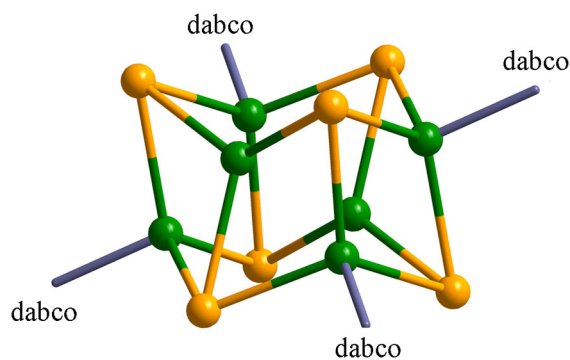

**Fig. S5.** The Cu<sub>6</sub>I<sub>6</sub> cluster unit in the reported compound for comparison.

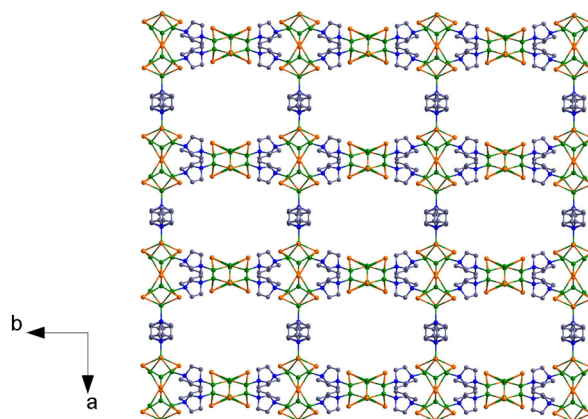

**Fig. S6.** The 3-D network of the reported compound in the *ab* plane, showing the arrangement and connecting between the layers, which is different from the situation in the title compound.

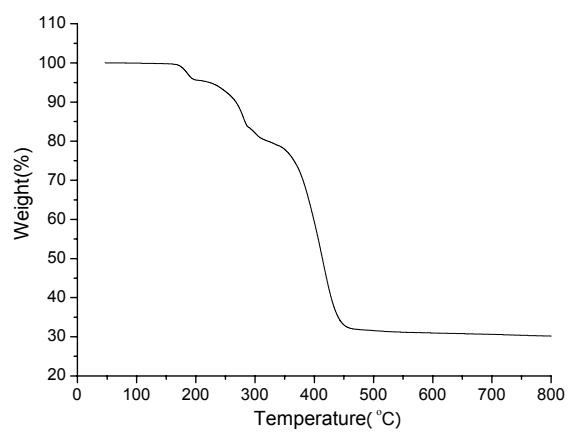

**Fig. S7.** TGA curve of the title compound
